# Supplementary material for: N 2 O isotope approaches for source partitioning of N 2 O production and estimation of N 2 O reduction – validation with 15 N gas-flux method in laboratory and field studies
Source: Copernicus journal article supplement (doi:10.5194/bg-2020-209), 2020-06-11
Supplement: Supplementary file 1 [file bg-2020-209-supplement.zip]

# **N<sub>2</sub>O isotope approaches for source partitioning of N<sub>2</sub>O production and estimation of N<sub>2</sub>O reduction – validation with <sup>15</sup>N gas-flux method in laboratory and field studies**

Dominika Lewicka-Szczebak<sup>1</sup>, Maciej Piotr Lewicki<sup>2</sup> and Reinhard Well<sup>3</sup>

<sup>1</sup> Centre for Stable Isotope Research and Analysis, University of Göttingen, Büsgenweg 2, 37077 Göttingen, Germany

<sup>2</sup> Institute of Theoretical Physics, Univeresity of Wrocław, pl. M. Borna 9, 50-204 Wrocław, Poland

<sup>3</sup> Thünen-Institut of Climate-Smart Agriculture, Bundesallee 50, 38116 Braunschweig, Germany

Correspondence to: Dominika Lewicka-Szczebak (dominika.lewicka@uni-goettingen.de)

Table S1: Summary of mixing endmembers isotopic signatures of particular pathways (bD- bacterial denitrification, nD- nitrifier denitrification, fD- fungal denitrification, Ni- nitrification) and reduction fractionation factors (reduction) with respective references (ref.). For the model input each value is corrected with the respective mean isotopic signature of the substrate: for  $\delta^{18}\text{O}$  – soil water ( $\delta^{18}\text{O}_{\text{H}_2\text{O}}$ ) for bD, nD and fD, for  $\delta^{15}\text{N}$  – respective substrate –  $\text{NO}_3^-$  for bD and fD and  $\text{NH}_4^+$  for nD and Ni, with distinct values applied for field ( $\delta^{15}\text{N}_{\text{field}}$  for F1, F2, F3) and laboratory ( $\delta^{15}\text{N}_{\text{lab}}$  for L1, L2) studies. The respective substrate corrected values were applied as a model input for  $\delta^{18}\text{O}$  and  $\delta^{15}\text{N}$ , for  $\delta^{15}\text{N}^{\text{SP}}$  no substrate correction is needed. The final model input values are marked with green bold font.

| pathway   | literature values                 |                       |                       |                      | substrate isotope values                   |                                      |                                    | substrate corrected values |                                      |                                    |
|-----------|-----------------------------------|-----------------------|-----------------------|----------------------|--------------------------------------------|--------------------------------------|------------------------------------|----------------------------|--------------------------------------|------------------------------------|
|           | $\delta^{15}\text{N}^{\text{SP}}$ | $\delta^{18}\text{O}$ | $\delta^{15}\text{N}$ | ref.                 | $\delta^{18}\text{O}_{\text{H}_2\text{O}}$ | $\delta^{15}\text{N}_{\text{field}}$ | $\delta^{15}\text{N}_{\text{lab}}$ | $\delta^{18}\text{O}$      | $\delta^{15}\text{N}_{\text{field}}$ | $\delta^{15}\text{N}_{\text{lab}}$ |
| bD        | <b>-1.9±4.6</b>                   | 19.0±2.1              | -45.8±4.7             | <sup>1-6</sup>       | -6.4                                       | 11.9                                 | 4.5                                | <b>12.6±2.1</b>            | <b>-33.9±4.7</b>                     | <b>-41.3±4.7</b>                   |
| nD        | <b>-5.9±6.5</b>                   | 15.7±2.9              | -56.9±3.8             | <sup>4,7</sup>       | -6.4                                       | 41.4                                 | 79.3                               | <b>9.3±2.9</b>             | <b>-15.5±3.8</b>                     | <b>22.4±3.8</b>                    |
| fD        | <b>33.6±2.5</b>                   | 46.9±3.8              | -38.0±6.6             | <sup>3,8-10</sup>    | -6.4                                       | 11.9                                 | 4.5                                | <b>40.5±3.8</b>            | <b>-26.1±6.6</b>                     | <b>-33.5±6.6</b>                   |
| Ni        | <b>35.0±2.9</b>                   | <b>23.5±2.1</b>       | -57.0±7.3             | <sup>4,7,11,12</sup> |                                            | 41.4                                 | 79.3                               |                            | <b>-15.6±7.3</b>                     | <b>22.3±7.3</b>                    |
| reduction | <b>-6.0±1.4</b>                   | <b>-15.9±4.7</b>      | <b>-7.0±2.1</b>       | <sup>2,13-17</sup>   |                                            |                                      |                                    |                            |                                      |                                    |

## References

- Barford CC, Montoya JP, Altabet MA, Mitchell R. Steady-state nitrogen isotope effects of N<sub>2</sub> and N<sub>2</sub>O production in *Paracoccus denitrificans*. *Appl Environ Microb*. 1999;65(3):989-994.
- Lewicka-Szczebak D, Well R, Koster JR, et al. Experimental determinations of isotopic fractionation factors associated with N<sub>2</sub>O production and reduction during denitrification in soils. *Geochim Cosmochim Ac*. 2014;134:55-73.
- Rohe L, Well R, Lewicka-Szczebak D. Use of oxygen isotopes to differentiate between nitrous oxide produced by fungi or bacteria during denitrification. *Rapid Communication in Mass Spectrometry*. 2017;31(16):1297-1312.
- Sutka RL, Ostrom NE, Ostrom PH, et al. Distinguishing nitrous oxide production from nitrification and denitrification on the basis of isotopomer abundances. *Appl Environ Microb*. 2006;72(1):638-644.
- Toyoda S, Mutoke H, Yamagishi H, Yoshida N, Tanji Y. Fractionation of N<sub>2</sub>O isotopomers during production by denitrifier. *Soil Biol Biochem*. 2005;37(8):1535-1545.
- Lewicka-Szczebak D, Dyckmanns J, Kaiser J, Marca A, Augustin J, Well R. Oxygen isotope fractionation during N<sub>2</sub>O production by soil denitrification. *Biogeosciences*. 2016;13:1129-1144.
- Frame CH, Casciotti KL. Biogeochemical controls and isotopic signatures of nitrous oxide production by a marine ammonia-oxidizing bacterium. *Biogeosciences*. 2010;7(9):2695-2709.
- Maeda K, Spor A, Edel-Hermann V, et al. N<sub>2</sub>O production, a widespread trait in fungi. *Sci Rep-Uk*. 2015;5:9697: 9691-9697.
- Rohe L, Anderson T-H, Braker G, et al. Dual isotope and isotopomer signatures of nitrous oxide from fungal denitrification – a pure culture study. *Rapid Commun Mass Sp*. 2014;28(17):1893-1903.

10. Sutka RL, Adams GC, Ostrom NE, Ostrom PH. Isotopologue fractionation during N<sub>2</sub>O production by fungal denitrification. *Rapid Commun Mass Sp.* 2008;22(24):3989-3996.
11. Mandernack KW, Mills CT, Johnson CA, Rahn T, Kinney C. The  $\delta^{15}\text{N}$  and  $\delta^{18}\text{O}$  values of N<sub>2</sub>O produced during the co-oxidation of ammonia by methanotrophic bacteria. *Chem Geol.* 2009;267(1-2):96-107.
12. Yoshida N.  $^{15}\text{N}$ -depleted N<sub>2</sub>O as a product of nitrification. *Nature.* 1988;335(6190):528-529.
13. Jinuntuya-Nortman M, Sutka RL, Ostrom PH, Gandhi H, Ostrom NE. Isotopologue fractionation during microbial reduction of N<sub>2</sub>O within soil mesocosms as a function of water-filled pore space. *Soil Biol Biochem.* 2008;40(9):2273-2280.
14. Lewicka-Szczebak D, Well R, Bol R, et al. Isotope fractionation factors controlling isotopocule signatures of soil-emitted N<sub>2</sub>O produced by denitrification processes of various rates. *Rapid Commun Mass Sp.* 2015;29:269–282.
15. Menyailo OV, Hungate BA. Stable isotope discrimination during soil denitrification: Production and consumption of nitrous oxide. *Global Biogeochem Cy.* 2006;20(3):GB3025.
16. Ostrom NE, Pitt A, Sutka R, et al. Isotopologue effects during N<sub>2</sub>O reduction in soils and in pure cultures of denitrifiers. *J Geophys Res-Bioge.* 2007;112(G2):G02005: 02001-02012.
17. Well R, Flessa H. Isotopologue enrichment factors of N<sub>2</sub>O reduction in soils. *Rapid Commun Mass Sp.* 2009;23(18):2996-3002.

Table S2: Comparison of SP/O Map results of all calculation cases (Case 1 and Case 2) and mixing scenarios (bD-fD and bD-Ni).

|           |      | $r_{\text{N}_2\text{O}}$ |             |             |             | $f_{\text{bD}}$ |             |             |             |
|-----------|------|--------------------------|-------------|-------------|-------------|-----------------|-------------|-------------|-------------|
| scenarios |      | bD-fD                    |             | bD-Ni       |             | bD-fD           |             | bD-Ni       |             |
| cases     |      | Case1                    | Case2       | Case1       | Case2       | Case1           | Case2       | Case1       | Case2       |
| L1        | min  | 0.15                     | 0.14        | 0.14        | 0.14        | 0.96            | 0.79        | 0.98        | 0.84        |
|           | max  | 0.24                     | 0.24        | 0.26        | 0.24        | 1               | 1           | 1           | 1           |
|           | mean | <b>0.19</b>              | <b>0.18</b> | <b>0.19</b> | <b>0.18</b> | <b>0.99</b>     | <b>0.93</b> | <b>0.99</b> | <b>0.95</b> |
| L2        | min  | 0.16                     | 0.15        | 0.16        | 0.16        | 0.94            | 0.88        | 0.96        | 0.91        |
|           | max  | 0.52                     | 0.53        | 0.45        | 0.46        | 1               | 1           | 1           | 1           |
|           | mean | <b>0.27</b>              | <b>0.27</b> | <b>0.25</b> | <b>0.25</b> | <b>0.98</b>     | <b>0.96</b> | <b>0.99</b> | <b>0.97</b> |
| F1        | min  | 0.68                     | 0.70        | 0.44        | 0.48        | 0.62            | 0.55        | 0.81        | 0.66        |
|           | max  | 1.00                     | 1.00        | 0.76        | 0.77        | 0.84            | 0.83        | 0.91        | 0.87        |
|           | mean | <b>0.86</b>              | <b>0.86</b> | <b>0.62</b> | <b>0.64</b> | <b>0.74</b>     | <b>0.70</b> | <b>0.86</b> | <b>0.77</b> |
| F2        | min  | 0.30                     | 0.36        | 0.22        | 0.27        | 0.84            | 0.64        | 0.94        | 0.73        |
|           | max  | 0.43                     | 0.49        | 0.38        | 0.39        | 0.95            | 0.89        | 0.97        | 0.92        |
|           | mean | <b>0.38</b>              | <b>0.42</b> | <b>0.29</b> | <b>0.32</b> | <b>0.92</b>     | <b>0.77</b> | <b>0.96</b> | <b>0.83</b> |
| F3        | min  | 0.26                     | 0.27        | 0.25        | 0.25        | 0.97            | 0.92        | 0.98        | 0.94        |
|           | max  | 0.47                     | 0.47        | 0.46        | 0.46        | 1               | 1           | 1           | 1           |
|           | mean | <b>0.33</b>              | <b>0.32</b> | <b>0.32</b> | <b>0.32</b> | <b>0.99</b>     | <b>0.97</b> | <b>0.99</b> | <b>0.98</b> |

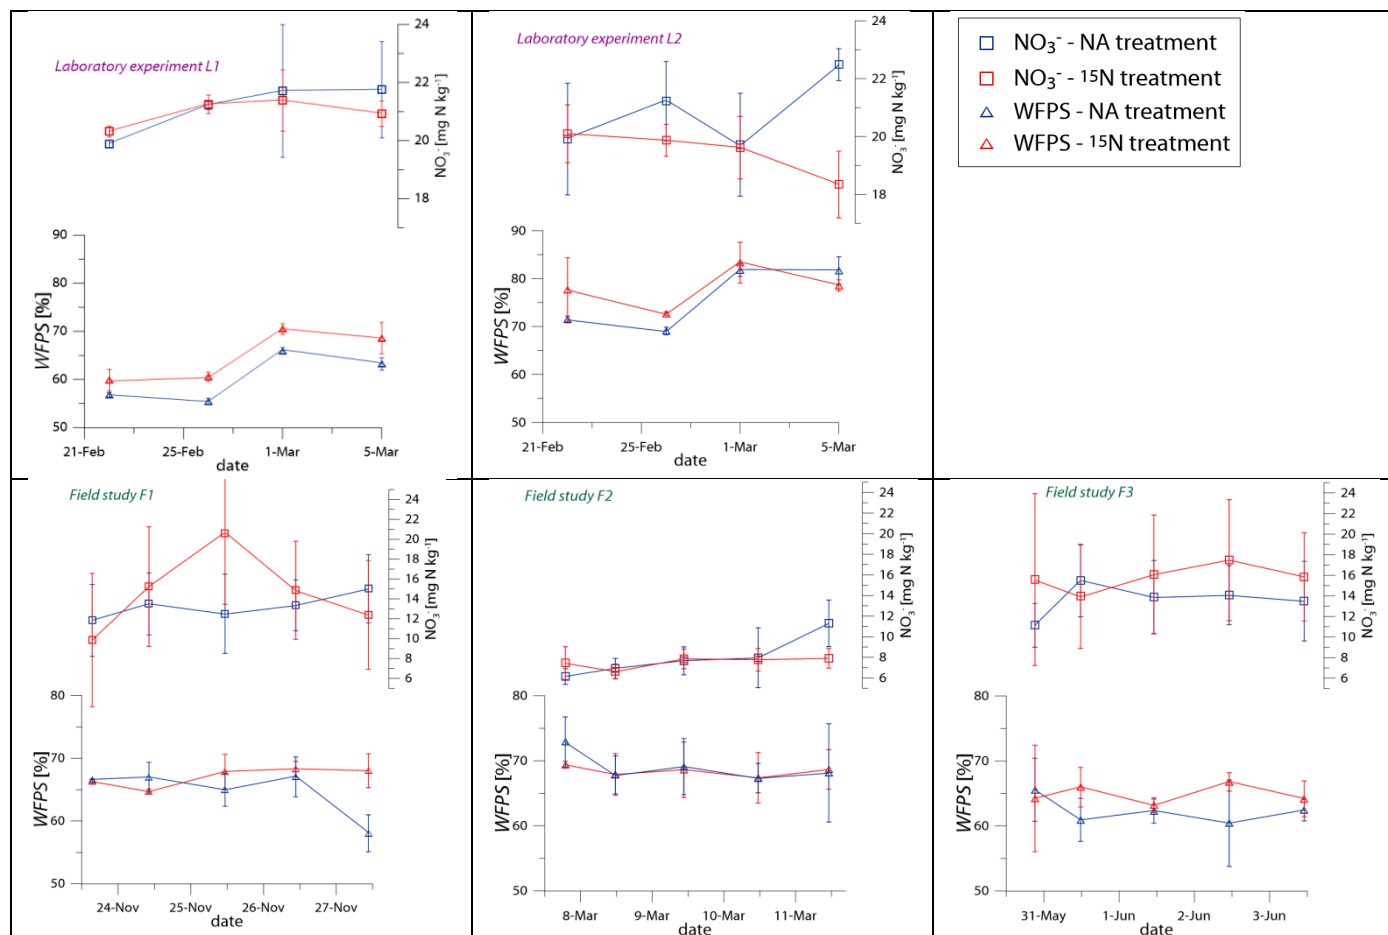

Fig. S1 Soil conditions during laboratory incubations and field campaigns. Water filled pore space (WFPS in %) and nitrate content in mg N kg<sup>-1</sup> dry soil is shown for NA treatment (blue symbols) and <sup>15</sup>N treatment (red symbols). Note different Y-Axis scaling for laboratory and field studies.

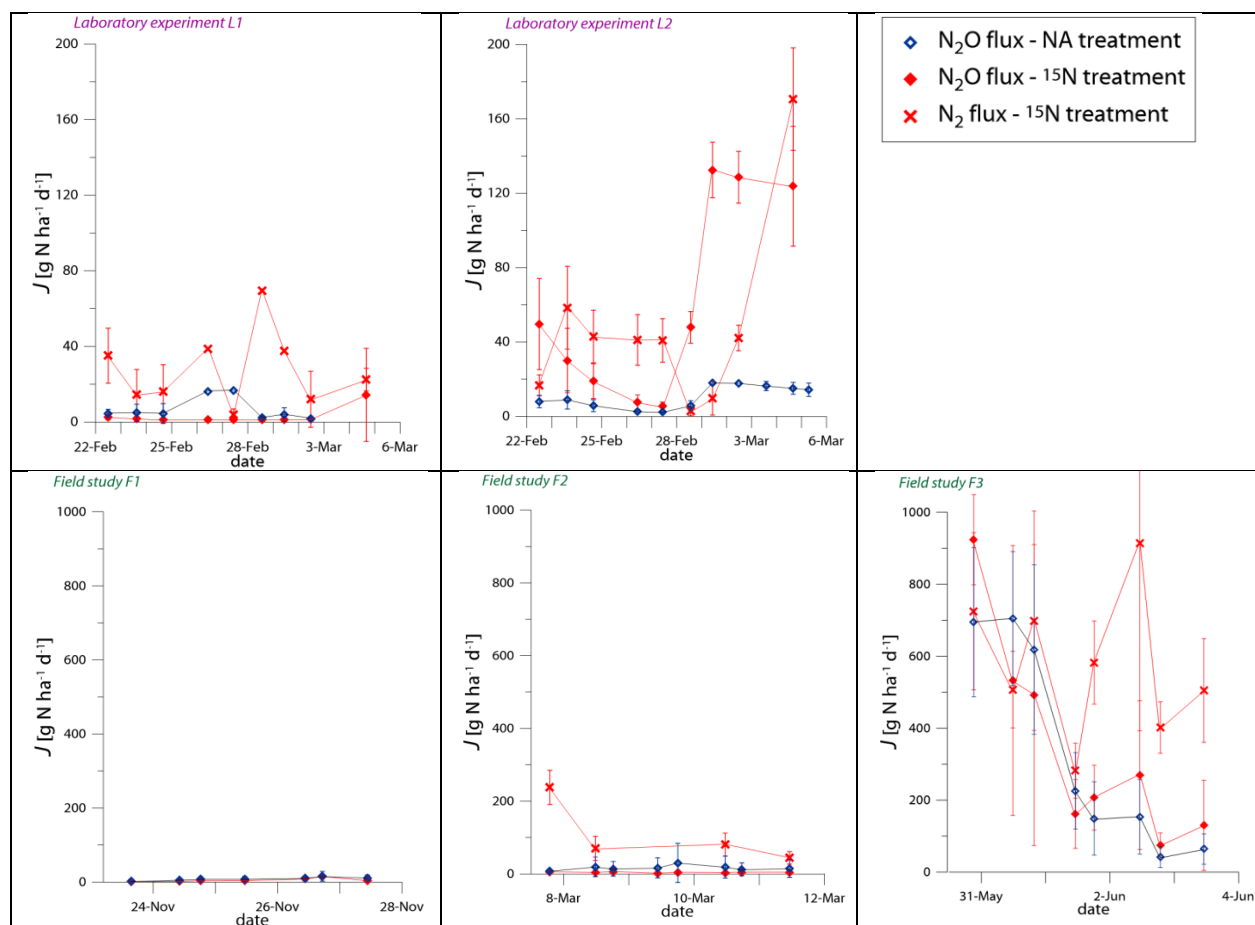

Fig. S2 Gas fluxes in  $\text{g N ha}^{-1} \text{d}^{-1}$ . Note different Y-Axis scaling for laboratory and field studies. Mean values for each sampling date with standard deviation ( $n=4$ ) are shown. N<sub>2</sub>O flux (diamonds) in NA treatment (blue symbols) and <sup>15</sup>N treatment (red symbols) and N<sub>2</sub> flux determined in <sup>15</sup>N treatment is shown (red crosses).

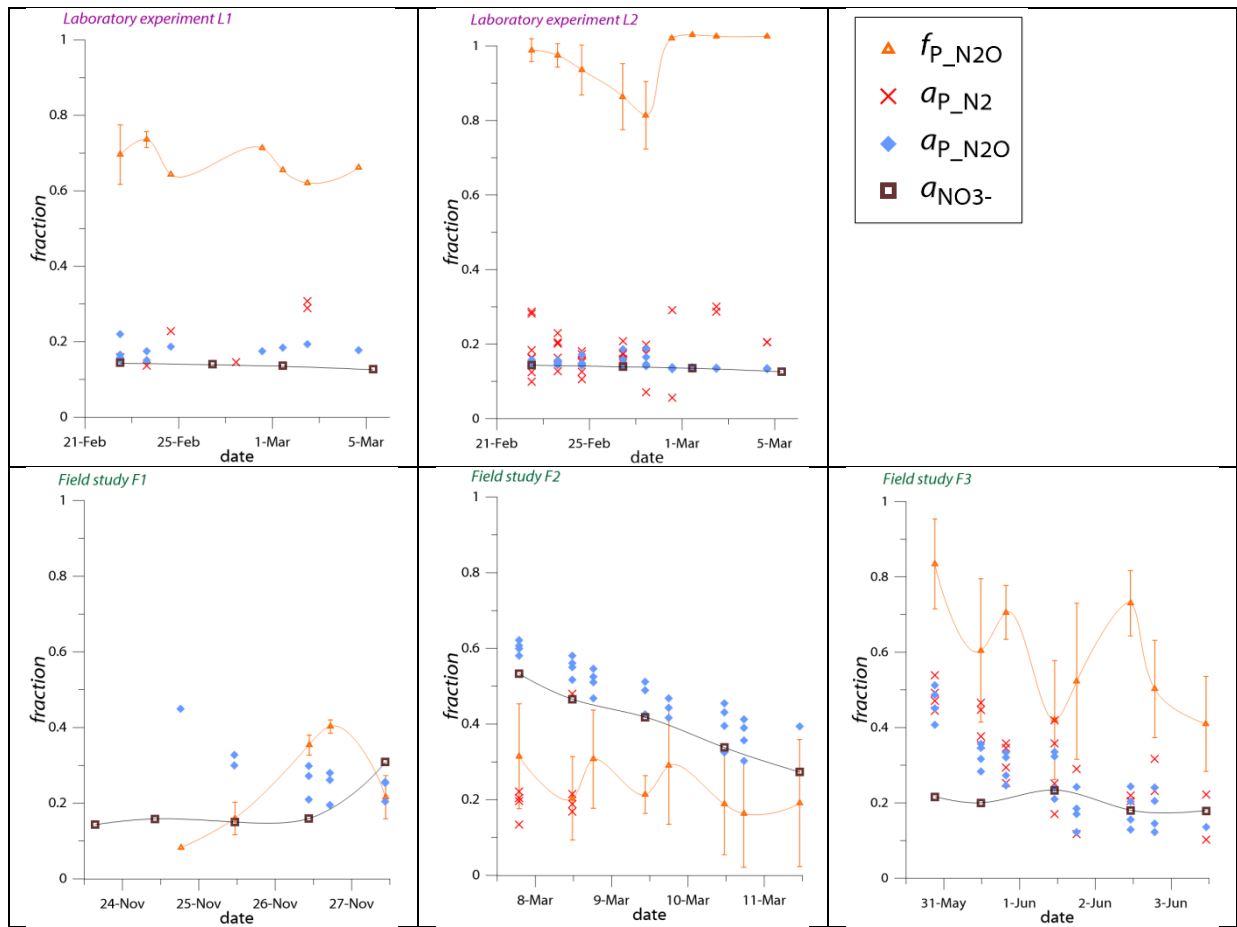

Fig. S3  $^{15}\text{N}$  abundance in total  $\text{NO}_3^-$  ( $a_{\text{NO}_3^-}$  – brown squares),  $\text{NO}_3^-$  pool producing  $\text{N}_2\text{O}$  ( $a_{\text{P\_N}_2\text{O}}$  – blue diamonds),  $\text{NO}_3^-$  pool producing  $\text{N}_2$  ( $a_{\text{P\_N}_2}$  – red crosses) and  $^{15}\text{N}$  pool-derived fraction of  $\text{N}_2\text{O}$  ( $f_{\text{P\_N}_2\text{O}}$  – orange triangles). For  $a_{\text{NO}_3^-}$  and  $f_{\text{P\_N}_2\text{O}}$  mean values for each sampling date with standard deviation ( $n=4$ ) are shown. For  $a_{\text{P\_N}_2}$  and  $a_{\text{P\_N}_2\text{O}}$  all individual values are shown (due to numerous missing data).

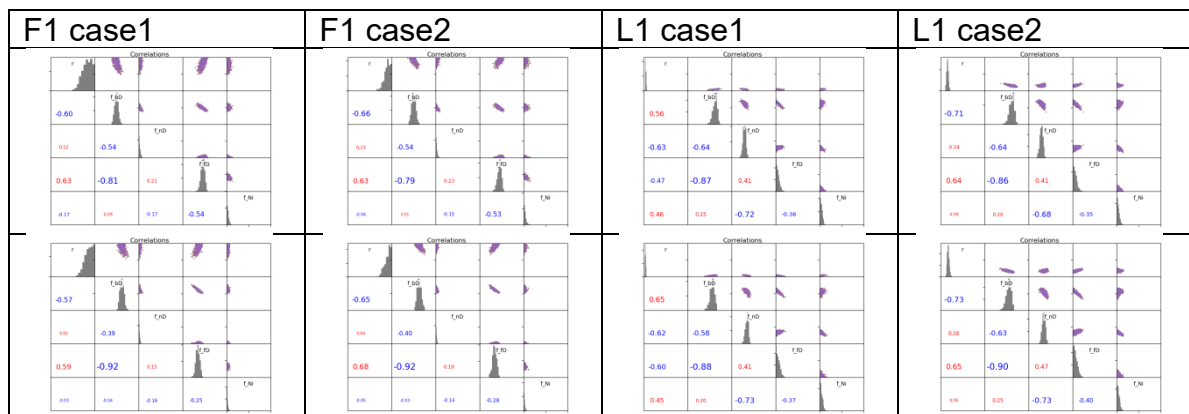



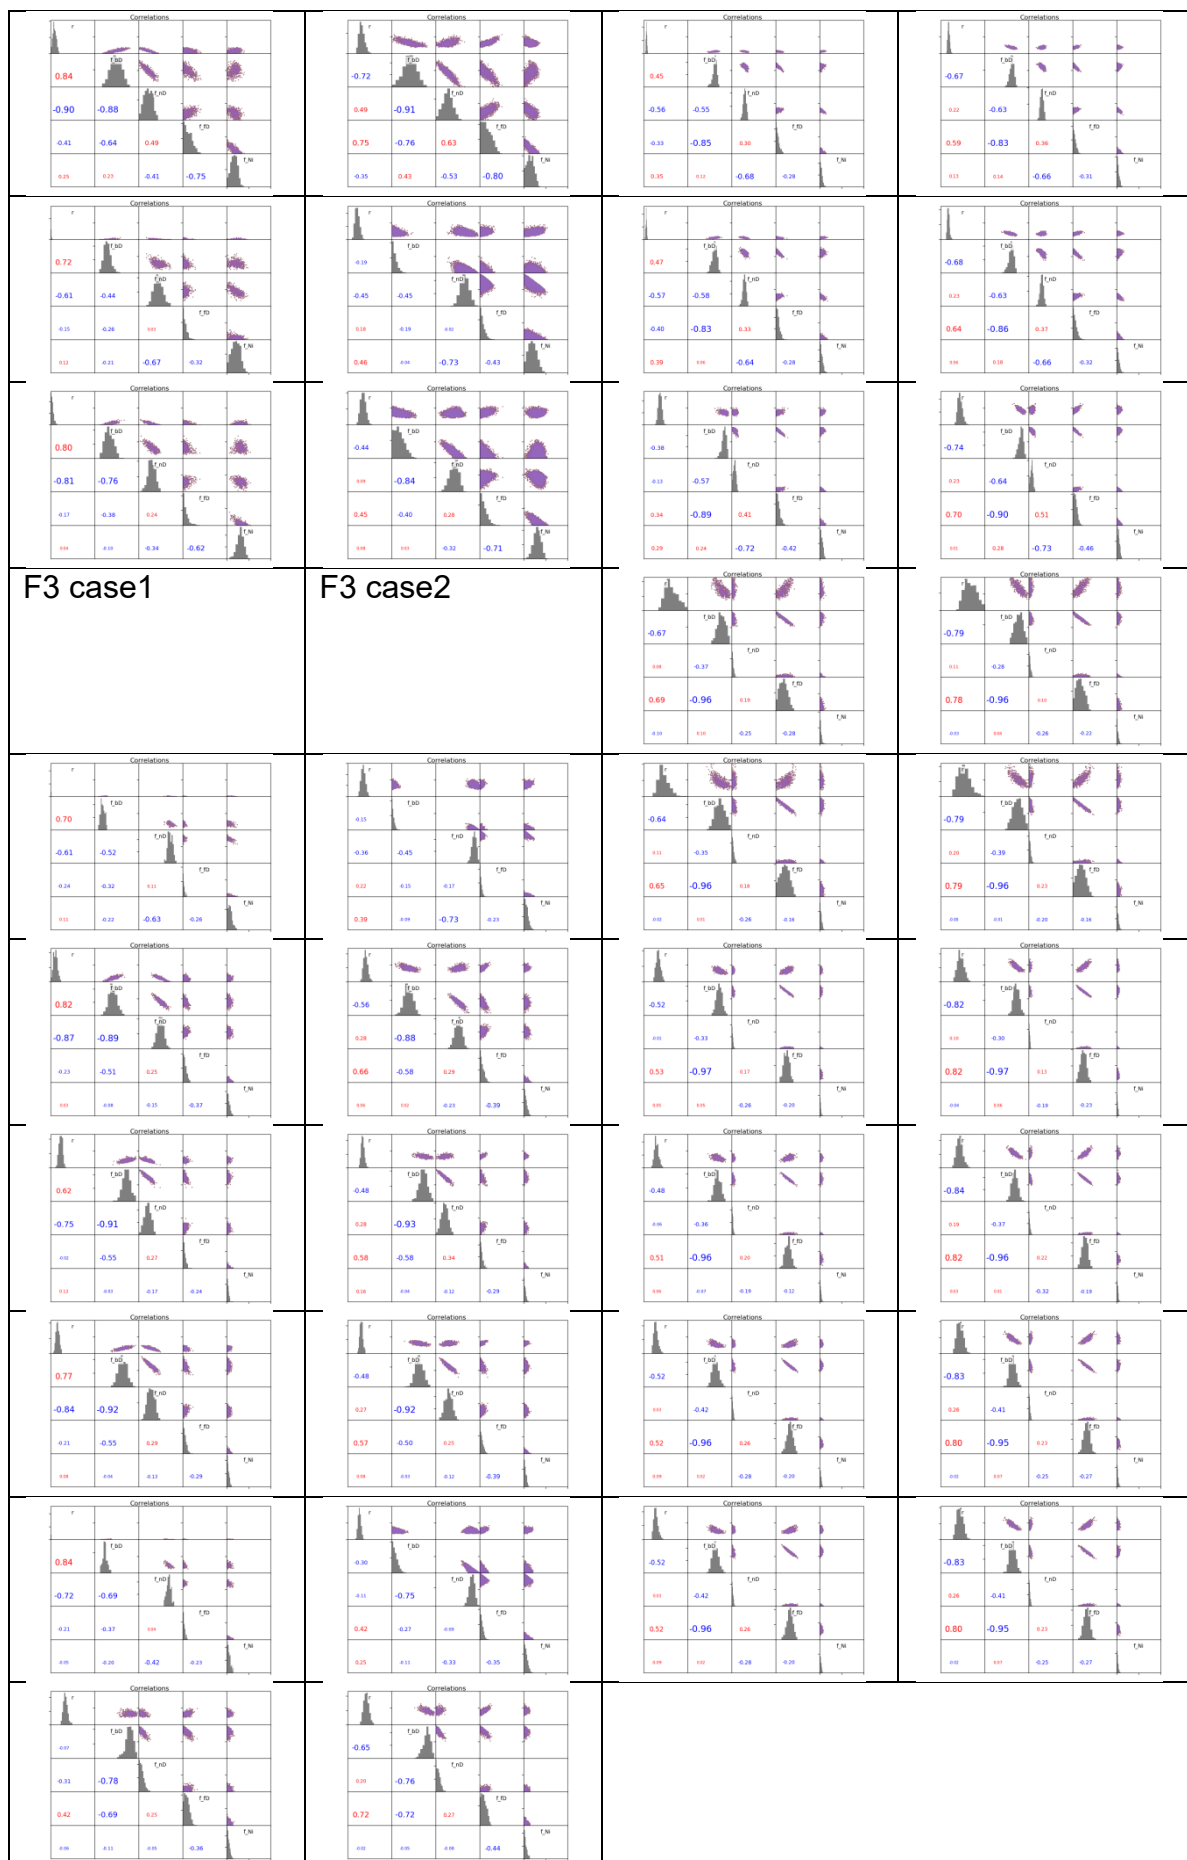

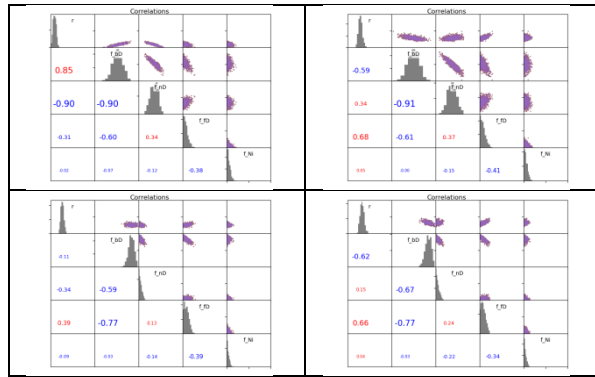

Fig. S4 Matrix plots presenting detailed 3DI model outputs for each sampling date for both calculating cases. The plots in the diagonal show histograms of posterior probability distribution of  $r_{N2O}$  and mixing fractions, the plots above the diagonal show correlations between the modeled fractions and the values below the diagonal show  $R$  coefficient of these correlations: in blue for positive correlations and in red for negative correlations with the size proportional to the  $R$  value.
