# Supplementary material for: N 2 O isotope approaches for source partitioning of N 2 O production and estimation of N 2 O reduction – validation with 15 N gas-flux method in laboratory and field studies
Source: Copernicus journal article supplement (doi:10.5194/bg-2020-209), 2020-06-11
Supplement: Supplementary file 1 [file SP_O_Map.xlsx]

## Sheet: F1
		date	time	date full		isotopes	d18O	d15N	SP		mixing scenario		Case 1					X	Y		r_av	r_stdev	f_av	f_stdev	Case2					r_av	r_stdev	f_av	f_stdev		mixing scenario		Case 1					X	Y		r_av	r_stdev	f_av	f_stdev	Case2
											bD-fD		a_red	b_red			bD	12.6	-1.9						a_mix	b_mix									bD-Ni		a_red	b_red			bD	12.6	-1.9						a_mix
							X		Y				0.377358	-6.65472			fD	40.5	33.6						1.2724	-17.9323											0.377358	-6.65472			fD	23.5	35						3.38532
																	eta_N2O/N2	-15.9	-6																						eta_N2O/N2	-15.9	-6
													a _mix	b_mix	X_intercept (d18O)	Y_intercept (SP)	r N2O	f bD	r total	f bD gross					b_red	X_intercept (d18O)	Y_intercept (SP)	r N2O	f bD								a _mix	b_mix	X_intercept (d18O)	Y_intercept (SP)	r N2O	f bD	r total	f bD gross					b_red
1	F1-TN1/1	2015-11-23	15:28:00	2015-11-23 15:28:00			36.8688		8.4599
	F1-TN2/1
2	F1-TN1/2	2015-11-24	10:11:00	2015-11-24 10:11:00			28.4075	-47.0071	19.4052				1.17385	-13.9409	9.14787	-3.20269	1	0.385699	1	0.385699	0.768738	0.267348	0.623373	0.234492	8.68542	29.739	19.9077	1	0.385699	0.787174	0.246002	0.547976	0.148505				-3.17774	109.677	32.7225	5.69339	0.28208	0.532125	0.424753	0.801268	0.437149	0.142023	0.841789	0.0890605	8.68542
	F1-TN2/2						30.9176	-14.4763	13.1739				2.13162	-52.7305	26.2651	3.25664	0.423399	0.673165	0.521719	0.829484					1.5069	21.7187	9.70262	0.560713	0.673165								-2.94249	104.149	33.376	5.93999	0.270721	0.75107	0.330769	0.917662					1.5069
	F1-TN3/2						23.3432	-43.3268	15.6837				1.04426	-8.69267	3.05584	-5.50157	1	0.458198	1	0.458198					6.875	27.7163	17.334	1	0.458198								123.166	-2859.4	23.233	2.11245	0.512353	0.587342	0.641429	0.73531					6.875
	F1-TN4/2						30.1157	-34.1572	12.8294				2.00019	-47.4078	25.1123	2.82162	0.455238	0.674842	0.553234	0.820112					1.46502	21.6719	9.64309	0.587983	0.674842								-3.3512	113.753	32.2934	5.53148	0.289795	0.752347	0.351644	0.912914					1.46502
3	F1-TN1/3	2015-11-24	18:20:00	2015-11-24 18:20:00			24.8895	-38.6979	8.24593				1.62417	-32.1787	20.4715	1.07037	0.609533	0.779415	0.666981	0.852874	0.677219	0.120662	0.79459	0.0723168	-1.14632	18.7543	5.93078	0.679867	0.779415	0.695359	0.111117	0.701028	0.0608747				-19.2547	487.486	25.1701	2.84342	0.453586	0.831994	0.499435	0.916092	0.448844	0.0668453	0.897863	0.0274459	-1.14632
	F1-TN3/3						28.4373		12.2108				1.77317	-38.2134	22.6096	1.87719	0.532841	0.674253	0.62848	0.795275					1.47973	21.6883	9.664	0.65412	0.674253								-4.61572	143.469	30.0665	4.69111	0.333364	0.751899	0.399427	0.900902					1.47973
	F1-TN3/3						25.2537	-51.2887	11.9401				1.42067	-23.9371	16.565	-0.403786	0.779292	0.636986	0.847167	0.692466					2.41036	22.7281	10.987	0.853129	0.636986								-13.1491	344.005	25.9239	3.12789	0.432583	0.723514	0.513076	0.858142					2.41036
	F1-TN4/3						28.8679	-36.1301	11.3943				1.90901	-43.7148	24.1962	2.47592	0.482237	0.713457	0.566246	0.837746					0.500755	20.5946	8.27229	0.594319	0.713457								-4.39754	138.342	30.3665	4.80434	0.327133	0.781757	0.38344	0.916317					0.500755
4	F1-TN1/4	2015-11-25	11:17:00	2015-11-25 11:17:00			15.0183	-26.9839	2.68599				1.21319	-15.5341	10.6234	-2.64588	1	0.852897	1	0.852897	0.860933	0.163863	0.727107	0.257887	-2.98131	16.7042	3.32215	1	0.852897	0.865259	0.158434	0.699007	0.241045				3.80987	-54.532	13.9482	-1.39126	0.918705	0.887961	0.92715	0.896123	0.759189	0.23605	0.807674	0.204033	-2.98131
	F1-TN2/4						21.6969	-30.189	5.90253				1.47303	-26.0576	17.7087	0.0278178	0.725203	0.825013	0.761837	0.866688					-2.28498	17.4821	4.31205	0.767145	0.825013								16.1375	-344.231	21.4196	1.42817	0.574248	0.866723	0.608793	0.918862					-2.28498
	F1-TN3/4						18.2119	-33.645	16.6877				0.758803	2.86846	-24.9661	-16.0759	1	0.340453	1	0.340453					9.81529	31.0014	21.5139	1	0.340453								3.46291	-46.3784	12.8741	-1.79657	0.98291	0.497663	0.991421	0.501973					9.81529
	F1-TN4/4						24.6137	-31.6997	8.18556				1.59977	-31.1907	20.0718	0.919546	0.62505	0.777665	0.681896	0.848391					-1.10263	18.8032	5.9929	0.693889	0.777665								-24.0768	600.805	24.8407	2.71915	0.463079	0.830661	0.509394	0.91374					-1.10263
5	F1-TN1/5	2015-11-26	10:37:00	2015-11-26 10:37:00			21.0305	-42.8361	8.60278				1.28392	-18.3986	12.9544	-1.76627	0.977959	0.706809	0.98432	0.711407	0.912779	0.0974032	0.835694	0.103011	0.666749	20.78	8.50826	0.98437	0.706809	0.913436	0.0964172	0.826174	0.0980945				10.6893	-216.198	20.3205	1.01339	0.615349	0.776695	0.673171	0.849677	0.730053	0.06225	0.905089	0.0489911	0.666749
	F1-TN2/5						19.0097	-25.1913	2.59511				1.44274	-24.831	17.0608	-0.216679	0.755366	0.916852	0.771049	0.935889					-4.57837	14.9198	1.05176	0.773193	0.916852								7.21668	-134.592	18.7061	0.404202	0.681108	0.936671	0.695147	0.955977					-4.57837
	F1-TN3/5						19.0941	-36.517	5.89929				1.29407	-18.8098	13.2595	-1.65114	0.959371	0.78581	0.967793	0.792709					-1.30604	18.5759	5.70373	0.967932	0.78581								6.60498	-120.217	18.2353	0.226513	0.701581	0.836865	0.737484	0.87969					-1.30604
	F1-TN5/5						16.7071	-23.93	2.26627				1.31694	-19.7359	13.9224	-1.40097	0.920193	0.895225	0.927952	0.902773					-4.0383	15.5232	1.81953	0.928247	0.895225								4.81882	-78.2423	16.118	-0.572447	0.801509	0.920199	0.814409	0.935009					-4.0383
6	F1-TN1/6	2015-11-26	17:16:00	2015-11-26 17:16:00			21.6795	-38.899	10.1147				1.24786	-16.9382	11.8133	-2.19685	1	0.656071	1	0.656071	1	0	0.70533	0.068299	1.93377	22.1956	10.3095	1	0.656071	1	0	0.70533	0.068299				13.6695	-286.234	21.0334	1.28241	0.588369	0.73805	0.659478	0.82725	0.699296	0.0657462	0.845319	0.0236281	1.93377
	F1-TN2/6						23.0429	-17.6448
	F1-TN3/6						21.4569	-35.5948	9.5175				1.26463	-17.6175	12.3556	-1.99223	1	0.676622	1	0.676622					1.42057	21.6222	9.57991	1	0.676622								12.4722	-258.097	20.7892	1.19026	0.597475	0.753703	0.663228	0.836649					1.42057
	F1-TN4/6						18.357	-20.2199	5.6839				1.26072	-17.4592	12.2311	-2.03921	1	0.783298	1	0.783298					-1.24329	18.646	5.79294	1	0.783298								5.70024	-98.9556	17.3404	-0.111169	0.742198	0.834951	0.775182	0.872057					-1.24329
8	F1-TN1/8	2015-11-27	10:37:00	2015-11-27 10:37:00			20.6911	-39.9518	8.53726				1.26523	-17.6417	12.3746	-1.98506	1	0.704305	1	0.704305	0.91462	0.126402	0.735574	0.120756	0.729288	20.8499	8.59717	1	0.704305	0.916268	0.123719	0.720409	0.102814				9.42112	-186.396	19.8747	0.845151	0.632848	0.774787	0.689893	0.844627	0.671371	0.0569397	0.85372	0.0644979	0.729288
	F1-TN2/8						21.7027	-27.2077	5.35861				1.50242	-27.2478	18.3041	0.252473	0.698552	0.846881	0.732356	0.887863					-2.83108	16.872	3.53572	0.737997	0.846881								16.4919	-352.56	21.4654	1.44543	0.572598	0.883379	0.602636	0.92972					-2.83108
	F1-TN3/8						20.5107	-44.2106	11.154				1.1229	-11.8774	7.00529	-4.01121	1	0.59679	1	0.59679					3.41413	23.8496	12.414	1	0.59679								7.97712	-152.462	19.1858	0.585213	0.660867	0.692899	0.737697	0.773453					3.41413
	F1-TN4/8						21.2348	-27.3077	8.00934				1.32834	-20.1977	14.2411	-1.28073	0.901936	0.733662	0.926125	0.753338					-0.00380157	20.0308	7.555	0.927074	0.733662								11.9154	-245.013	20.6584	1.1409	0.60241	0.797147	0.655258	0.867079					-0.00380157
							23.2464	-33.3527	9.35599							min	0.423399	0.340453	0.521719	0.340453	0.677219		0.623373				min	0.560713	0.340453	0.695359		0.547976								min	0.270721	0.497663	0.330769	0.501973	0.437149		0.807674
							5.05699	9.53546	4.39613							max	1	0.916852	1	0.935889	1		0.835694				max	1	0.916852	1		0.826174								max	0.98291	0.936671	0.991421	0.955977	0.759189		0.905089
																av	0.819399	0.699755	0.849442	0.738319	0.855715	0.115756	0.736945	0.0735814			av	0.856956	0.699755	0.862916		0.699987								av	0.56682	0.771322	0.621057	0.859152	0.624317		0.858575
[truncated: 8 more columns]

## Sheet: F2
		date	time	date full		isotopes	d18O	d15N	SP		mixing scenario		Case 1					X	Y		r_av	r_stdev	f_av	f_stdev	Case2					r_av	r_stdev	f_av	f_stdev		mixing scenario		Case 1					X	Y		r_av	r_stdev	f_av	f_stdev	Case2
											bD-fD		a_red	b_red			bD	12.6	-1.9						a_mix	b_mix									bD-Ni		a_red	b_red			bD	12.6	-1.9						a_mix
							X		Y				0.377358	-6.65472			fD	40.5	33.6						1.2724	-17.9323											0.377358	-6.65472			fD	23.5	35						3.38532
																	eta_N2O/N2	-15.9	-6																						eta_N2O/N2	-15.9	-6
													a _mix	b_mix	X_intercept (d18O)	Y_intercept (SP)	r N2O	f bD	r total	f bD gross					b_red	X_intercept (d18O)	Y_intercept (SP)	r N2O	f bD								a _mix	b_mix	X_intercept (d18O)	Y_intercept (SP)	r N2O	f bD	r total	f bD gross					b_red
1	F2-N1/1	2016-03-07	18:54:00	2016-03-07 18:54:00																	0.414587	0.0262933	0.929772	0.0276303						0.437873	0.0337411	0.832385	0.0560151												0.335252	0.00473804	0.957302	0.0136981
	F2-N2/1
	F2-N3/1						30.1929	-7.52905	7.93537				2.48999	-67.2445	28.6798	4.16785	0.363743	0.871993	0.395995	0.94931					-3.45817	16.1714	2.64424	0.414015	0.871993								-4.0438	130.029	30.9159	5.01165	0.316022	0.902505	0.338602	0.966988					-3.45817
	F2-N4/1						30.6686	-18.5177	10.0931				2.39101	-63.2358	28.0988	3.9486	0.377281	0.792776	0.433179	0.910235					-1.47998	18.3816	5.45646	0.461732	0.792776								-3.47444	116.649	32.0121	5.42531	0.294969	0.84217	0.331901	0.947616					-1.47998
2	F2-N1/2	2016-03-08	11:40:00	2016-03-08 11:40:00																	0.407769	0.159575	0.945087	0.0286642						0.424867	0.156071	0.869061	0.019054												0.345468	0.125209	0.964639	0.0175003
	F2-N2/2
	F2-N3/2						34.2695	-16.3391	9.21048				3.91455	-124.939	33.4402	5.96424	0.269629	0.882535	0.294933	0.965356					-3.72141	15.8773	2.27002	0.314508	0.882535								-2.39468	91.2749	35.3277	6.67649	0.239449	0.910534	0.256932	0.977013					-3.72141
	F2-N4/2						26.5677	-33.0458	6.97702				1.91088	-43.7905	24.2161	2.48342	0.481634	0.855588	0.520606	0.924818					-3.04851	16.6291	3.22662	0.535226	0.855588								-9.13499	249.672	26.9468	3.51387	0.405631	0.89001	0.434004	0.952264					-3.04851
3	F2-N1/3	2016-03-08	18:14:00	2016-03-08 18:14:00																	0.431284	0.0815366	0.953798	0.00631404						0.445905	0.0737428	0.889516	0.0355277												0.37856	0.0875684	0.969329	0.00287477
	F2-N3/3
	F2-N3/3						31.2024	-25.1736	8.50607				2.69896	-75.7078	29.7438	4.56934	0.340199	0.864394	0.373629	0.949334					-3.26841	16.3834	2.91401	0.393761	0.864394								-3.43971	115.833	32.0895	5.45453	0.293536	0.896717	0.31664	0.967297					-3.26841
	F2-N4/3						26.0648	-34.5242	5.31269				1.95961	-45.764	24.7176	2.67267	0.46668	0.914638	0.488939	0.958263					-4.52308	14.9816	1.13036	0.498049	0.914638								-11.5749	307.011	26.2431	3.24835	0.423984	0.934985	0.44048	0.971362					-4.52308
4	F2-N1/4	2016-03-09	10:35:00	2016-03-09 10:35:00																	0.295503	0.178546	0.93814	0.0127251						0.363939	0.109392	0.70692	0.227728												0.229824	0.164135	0.966471	0.0126009
	F2-N2/4						49.2364	3.94293	25.8098				-0.891688	69.7134	60.1775	16.0538	0.050172	0.443979	0.106325	0.940881					7.23006	28.113	17.8387	0.264869	0.443979								-0.357088	43.3916	68.1415	19.0591	0.0304041	0.576513	0.0515858	0.978154					7.23006
	F2-N3/4						33.928	-33.8972	10.118				3.57306	-111.109	32.6858	5.67956	0.282731	0.841034	0.319117	0.949271					-2.68506	17.0352	3.7433	0.34561	0.841034								-2.38607	91.0727	35.3645	6.69039	0.238895	0.878925	0.263144	0.96814					-2.68506
	F2-N4/4						28.8086	-33.6041	8.31815				2.16243	-53.9782	26.5108	3.34935	0.416907	0.835746	0.461066	0.924268					-2.55301	17.1827	3.93103	0.481337	0.835746								-5.02619	153.115	29.5676	4.50288	0.343988	0.874897	0.374743	0.953119					-2.55301
5	F2-N1/5	2016-03-09	17:59:00	2016-03-09 17:59:00																	0.40823	0.0137842	0.944083	0.00488906						0.427222	0.0106351	0.862744	0.0166108												0.344839	0.0189913	0.964071	0.00237737
	F2-N2/5
	F2-N3/5						29.3465	-40.3396	7.55362				2.33526	-60.9779	27.7457	3.81534	0.385753	0.87449	0.417977	0.94754					-3.52051	16.1017	2.55561	0.434742	0.87449								-4.69453	145.321	29.9644	4.65261	0.335511	0.904407	0.358268	0.965752					-3.52051
	F2-N5/5						30.5617	-32.2626	8.59881				2.51563	-68.2832	28.8216	4.22135	0.360514	0.850999	0.398483	0.940625					-2.9339	16.7571	3.38955	0.419702	0.850999								-3.73866	122.858	31.4657	5.21912	0.305282	0.886515	0.33141	0.96239					-2.9339
6	F2-N1/6	2016-03-10	11:27:00	2016-03-10 11:27:00																	0.326635	0.0917186	0.909145	0.0310602						0.381805	0.070819	0.710409	0.0998952												0.227537	0.0829933	0.953462	0.0128079
	F2-N2/6						41.7812	-2.78143	18.2745				-11.9621	518.066	42.5237	9.39197	0.152286	0.633075	0.22104	0.918895					2.50802	22.8372	11.1258	0.303782	0.633075								-0.914903	56.5002	48.8716	11.7874	0.102158	0.720536	0.136377	0.961888					2.50802
	F2-N3/6						34.6494	-13.8915	14.5374				3.25825	-98.359	31.8319	5.35734	0.29833	0.674956	0.386474	0.874379					1.46218	21.6687	9.63906	0.442021	0.674956								-1.8353	78.1295	38.3178	7.80485	0.198399	0.752434	0.247519	0.938723					1.46218
	F2-N4/6						32.1173	-33.2076	9.88014				2.82962	-80.9995	30.3169	4.78561	0.328155	0.823195	0.37239	0.93416					-2.23959	17.5329	4.37658	0.399613	0.823195								-2.91505	103.504	33.4583	5.97105	0.269323	0.865338	0.298715	0.959775					-2.23959
7	F2-N1/7	2016-03-10	17:33:00	2016-03-10 17:33:00																	0.347027		0.885831							0.407982		0.671008													0.221771	#DIV/0!	0.94443	#DIV/0!
	F2-N2/7
	F2-N3/7						36.0337	-0.109608	15.1584				4.12908	-133.628	33.8439	6.11658	0.26287	0.671008	0.347027	0.885831					1.56077	21.7789	9.77921	0.407982	0.671008								-1.58306	72.2019	40.2244	8.5243	0.17598	0.749427	0.221771	0.94443					1.56077
	F2-N4/7
8	F2-N1/8	2016-03-11	11:07:00	2016-03-11 11:07:00																	0.432798	0.0646683	0.837342	0.115251						0.491417	0.102013	0.640049	0.21251												0.253227	0.0608847	0.935504	0.0242946
	F2-N2/8
	F2-N3/8						35.9537	10.505	19.6537				3.06761	-90.6382	31.2177	5.12555	0.31008	0.489782	0.478526	0.755847					6.0863	26.8351	16.2127	0.563551	0.489782								-1.23227	63.9582	43.8692	9.89971	0.139929	0.611398	0.210175	0.918326					6.0863
	F2-N4/8						32.2706	-32.9842	10.759				2.77553	-78.809	30.0872	4.69894	0.33293	0.790316	0.387071	0.918837					-1.41855	18.4502	5.54378	0.419283	0.790316								-2.76389	99.9515	33.9375	6.15189	0.261327	0.840297	0.296279	0.952683					-1.41855
							33.1561	-20.2211	11.5704							min	0.050172	0.443979	0.106325	0.755847	0.295503		0.837342				min	0.264869	0.443979	0.363939		0.640049								min	0.0304041	0.576513	0.0515858	0.918326	0.221771		0.935504
							5.63266	16.0015	5.39968							max	0.481634	0.914638	0.520606	0.965356	0.432798		0.953798				max	0.563551	0.914638	0.491417		0.889516								max	0.423984	0.934985	0.44048	0.978154	0.37856		0.969329
																av	0.322347	0.771206	0.376634	0.920462	0.382979	0.0523531	0.9179	0.0393856			av	0.417634	0.771206	0.422626		0.772761								av	0.257341	0.825742	0.288738	0.957995	0.29206		0.956901
[truncated: 4 more columns]

## Sheet: F3
		date	time	date full		isotopes	d18O	d15N	SP		mixing scenario		Case 1					X	Y		r_av	r_stdev	f_av	f_stdev	Case2					r_av	r_stdev	f_av	f_stdev		mixing scenario		Case 1					X	Y		r_av	r_stdev	f_av	f_stdev	Case2
											bD-fD		a_red	b_red			bD	12.6	-1.9						a_mix	b_mix									bD-Ni		a_red	b_red			bD	12.6	-1.9						a_mix
							X		Y				0.377358	-6.65472			fD	40.5	33.6						1.2724	-17.9323											0.377358	-6.65472			fD	23.5	35						3.38532
																	eta_N2O/N2	-15.9	-6																						eta_N2O/N2	-15.9	-6
													a _mix	b_mix	X_intercept (d18O)	Y_intercept (SP)	r N2O	f bD	r total	f bD gross					b_red	X_intercept (d18O)	Y_intercept (SP)	r N2O	f bD								a _mix	b_mix	X_intercept (d18O)	Y_intercept (SP)	r N2O	f bD	r total	f bD gross					b_red
1	F3-N1/1	2016-05-30	21:09:00	2016-05-30 21:09:00									0.82963	0	-14.714	-12.2072					0.470496	0.0565384	0.987783	0.00347601						0.473224	0.0565603	0.974293	0.00429881												0.456166	0.0523103	0.990983	0.00251776
	F3-N2/1						26.5326	-1.11465	3.92361				2.12469	-52.4497	26.2086	3.23533	0.424906	0.977333	0.430518	0.990241					-6.08868	13.2324	-1.09531	0.433229	0.977333								-10.2475	275.817	26.5858	3.37768	0.414943	0.982736	0.419177	0.992763					-6.08868
	F3-N3/1						24.0082	-5.96745	3.12284				1.84802	-41.2448	23.5201	2.22079	0.503185	0.971253	0.510475	0.985326					-5.93686	13.402	-0.879492	0.513218	0.971253								-62.7247	1509.03	24.0196	2.40928	0.487623	0.978105	0.493155	0.989203					-5.93686
	F3-N4/1												0.82963	0	-14.714	-12.2072
2	F3-N1/2	2016-05-31	11:43:00	2016-05-31 11:43:00			29.6801	-5.96579	3.78243				2.75581	-78.0101	30.0008	4.66636	0.334743	1	0.334743	1	0.3749	0.0356015	1	0	-7.4176	11.7477	-2.98452	0.323736	1	0.369352	0.0356672	1	0				-5.05131	153.706	29.5396	4.49229	0.344596	1	0.344596	1	0.380776	0.0381178	0.999856	0.000287364	-7.4176
	F3-N2/2						28.7443	-22.7189	4.17178				2.50331	-67.7841	28.7539	4.1958	0.362052	1	0.362052	1					-6.67511	12.5772	-1.929	0.361752	1								-5.87845	173.143	28.741	4.19095	0.362345	1	0.362345	1					-6.67511
	F3-N3/2						25.9765	-20.2367	2.3413				2.15228	-53.5673	26.4308	3.31917	0.419009	1	0.419009	1					-7.46114	11.699	-3.04642	0.407403	1								-13.1876	344.909	25.917	3.12529	0.43277	1	0.43277	1					-7.46114
	F3-N4/2						27.8515	-18.38	3.90444				2.34776	-61.4842	27.8266	3.84588	0.383795	1	0.383795	1					-6.60557	12.6549	-1.83013	0.384519	1								-7.14591	202.929	27.8581	3.85776	0.383036	0.998501	0.383391	0.999425					-6.60557
3	F3-N1/3	2016-05-31	19:40:00	2016-05-31 19:40:00			33.1417	-23.9402	5.19292				3.86054	-122.752	33.3308	5.92294	0.271492	1	0.271492	1	0.3027	0.0212178	1	1.43329e-16	-7.31338	11.8641	-2.83636	0.262314	1	0.291687	0.0209635	1	0				-3.09148	107.65	32.9518	5.77993	0.278041	1	0.278041	1	0.312215	0.0260514	0.999325	0.00134909	-7.31338
	F3-N3/3						31.4401	-14.8028	5.49828				3.10176	-92.0211	31.334	5.16945	0.307819	1	0.307819	1					-6.3659	12.9227	-1.48941	0.312043	1								-3.71555	122.315	31.5106	5.23609	0.30442	0.991191	0.306297	0.997302					-6.3659
	F3-N3/3						30.2324	-20.7591	3.24655				2.95623	-86.1274	30.8168	4.97427	0.317997	1	0.317997	1					-8.1619	10.9161	-4.04262	0.296751	1								-4.71652	145.838	29.9365	4.64208	0.3361	1	0.3361	1					-8.1619
	F3-N4/3						30.5659	-27.6579	3.61756				3.01814	-88.6345	31.0438	5.05993	0.31349	1	0.31349	1					-7.91674	11.19	-3.69411	0.29564	1								-4.44139	139.373	30.304	4.78076	0.328421	1	0.328421	1					-7.91674
4	F3-N1/4	2016-06-01	11:06:00	2016-06-01 11:06:00			33.8538	-20.5495	8.05026				3.84429	-122.094	33.2972	5.91025	0.272067	0.922715	0.288285	0.97772	0.286814	0.0483571	0.99443	0.0111401	-4.72477	14.7563	0.84363	0.300861	0.922715	0.277723	0.0585808	0.980679	0.0386427				-2.60287	96.1675	34.5014	6.36469	0.252221	0.941136	0.263835	0.98447	0.289348	0.0478543	0.996117	0.00776512	-4.72477
	F3-N2/4						35.5535	-17.243	4.41159				5.90078	-205.382	35.9789	6.92224	0.22984	1	0.22984	1					-9.00481	9.97432	-5.24092	0.200137	1								-2.53773	94.6366	34.7473	6.45747	0.248351	1	0.248351	1					-9.00481
	F3-N3/4						32.5548	-11.0114	4.92793				3.60874	-112.554	32.7721	5.71212	0.281201	1	0.281201	1					-7.35691	11.8155	-2.89824	0.271346	1								-3.32111	113.046	32.365	5.55847	0.288495	1	0.288495	1					-7.35691
	F3-N4/4						29.0985	-28.6969	3.67905				2.6243	-72.6843	29.3864	4.43448	0.347932	1	0.347932	1					-7.30152	11.8773	-2.8195	0.338547	1								-5.59451	166.471	28.9902	4.28498	0.35671	1	0.35671	1					-7.30152
5	F3-N1/5	2016-06-01	18:05:00	2016-06-01 18:05:00																	0.28006	0.0179351	1	1.11022e-16						0.275221	0.026946	1	0												0.284257	0.0131629	0.998745	0.00217387
	F3-N2/5						33.6725	-5.56616	5.21974				4.15676	-134.749	33.8927	6.13497	0.262065	1	0.262065	1					-7.48686	11.6703	-3.08298	0.250628	1								-2.92753	103.797	33.4207	5.95687	0.269961	1	0.269961	1					-7.48686
	F3-N3/5						32.6293	-5.49052	5.00515				3.63308	-113.54	32.8299	5.73393	0.280181	1	0.280181	1					-7.3078	11.8703	-2.82842	0.271011	1								-3.28556	112.211	32.451	5.59095	0.286937	1	0.286937	1					-7.3078
	F3-N5/5						31.9975	-9.84951	5.83704				3.26526	-98.6431	31.853	5.36528	0.297935	1	0.297935	1					-6.23748	13.0662	-1.30685	0.304024	1								-3.43195	115.651	32.107	5.46114	0.293213	0.987274	0.295874	0.996235					-6.23748
6	F3-N1/6	2016-06-02	11:06:00	2016-06-02 11:06:00																	0.36109	0.0457474	0.969858	0.0195252						0.372589	0.0500184	0.919495	0.0426502												0.327034	0.0273828	0.979608	0.012171
	F3-N2/6						31.9272	-26.7181	7.27745				3.07048	-90.7546	31.2276	5.12929	0.309887	0.924548	0.326909	0.975334					-4.77056	14.7051	0.778538	0.338527	0.924548								-3.28964	112.306	32.441	5.58719	0.287117	0.942533	0.299382	0.982795					-4.77056
	F3-N3/6						30.4602	-22.9606	5.85373				2.76364	-78.3274	30.0353	4.67936	0.334018	0.959393	0.343302	0.98606					-5.6407	13.7329	-0.458461	0.349227	0.959393								-4.18753	133.407	30.6824	4.92354	0.320698	0.969072	0.32758	0.989869					-5.6407
	F3-N4/6						29.5188	-30.232	7.61734				2.36611	-62.2276	27.9436	3.89002	0.380982	0.874543	0.41306	0.948179					-3.52185	16.1002	2.55372	0.430014	0.874543								-4.54949	141.913	30.1547	4.72442	0.331519	0.904447	0.35414	0.966161					-3.52185
7	F3-N1/7	2016-06-02	18:48:00	2016-06-02 18:48:00																	0.262563	0.0406882	0.989453	0.00626461						0.268814	0.0424198	0.961045	0.0178577												0.251056	0.0351288	0.992371	0.00437067
	F3-N2/7						36.9696	-14.4663	8.21781				7.1897	-257.583	36.8343	7.24504	0.217801	0.963089	0.224276	0.991722					-5.733	13.6298	-0.589676	0.230405	0.963089								-1.98834	81.7259	37.3593	7.44312	0.210728	0.971888	0.21551	0.993941					-5.733
	F3-N3/7						34.5348	-12.7298	6.93185				4.47064	-147.461	34.3993	6.32617	0.253846	0.977792	0.258123	0.994268					-6.10016	13.2196	-1.11163	0.261694	0.977792								-2.5436	94.7745	34.7247	6.44894	0.248705	0.983086	0.251906	0.995739					-6.10016
	F3-N4/7						32.6117	-22.6761	7.09362				3.36021	-102.489	32.1283	5.46915	0.292821	0.942253	0.305289	0.982371					-5.21268	14.2111	0.150017	0.314344	0.942253								-3.0627	106.973	33.0309	5.80977	0.276661	0.956018	0.285752	0.987432					-5.21268
8	F3-N1/8	2016-06-03	11:02:00	2016-06-03 11:02:00																	0.262312	0.0293585	0.986668	0.00392211						0.27092	0.0262663	0.947891	0.0200633												0.247901	0.032585	0.990459	0.00258013
	F3-N2/8						36.5844	-30.6066	9.00598				6.28108	-220.784	36.2702	7.03214	0.225668	0.925706	0.239443	0.982211					-4.79946	14.6728	0.737445	0.25206	0.925706								-1.98664	81.686	37.3692	7.44688	0.210596	0.943415	0.220443	0.987526					-4.79946
	F3-N3/8						32.6776	-20.7131	6.55639				3.45719	-106.416	32.3919	5.56863	0.288007	0.964762	0.295418	0.98959					-5.77478	13.5831	-0.649068	0.300921	0.964762								-3.09925	107.832	32.9307	5.77196	0.27841	0.973162	0.283909	0.99238					-5.77478
	F3-N4/8						35.3375	-28.555	7.84873				4.98812	-168.419	35.084	6.58455	0.243147	0.953205	0.252074	0.988204					-5.48617	13.9056	-0.238781	0.25978	0.953205								-2.29367	88.9012	35.775	6.84527	0.232807	0.964359	0.239352	0.991469					-5.48617
							31.4675	-18.0618	5.47444							min	0.217801	0.874543	0.224276	0.948179	0.262312		0.969858				min	0.200137	0.874543	0.268814		0.919495								min	0.210596	0.904447	0.21551	0.966161	0.247901		0.979608
							3.24524	8.68641	1.83858							max	0.503185	1	0.510475	1	0.470496		1				max	0.513218	1	0.473224		1								max	0.487623	1	0.493155	1	0.456166		0.999856
																av	0.313688	0.975254	0.319105	0.99197	0.325117	0.0724715	0.991024	0.0102349			av	0.317851	0.975254	0.324941		0.972925								av	0.310209	0.980266	0.314324	0.994104	0.318594		0.993433
[truncated: 8 more columns]

## Sheet: L1
		date	time	date full		isotopes	d18O	d15N	SP		mixing scenario		Case 1					X	Y		r_av	r_stdev	f_av	f_stdev	Case2					r_av	r_stdev	f_av	f_stdev		mixing scenario		Case 1					X	Y		r_av	r_stdev	f_av	f_stdev	Case2
											bD-fD		a_red	b_red			bD	12.6	-1.9						a_mix	b_mix									bD-Ni		a_red	b_red			bD	12.6	-1.9						a_mix
							X		Y				0.377358	-6.65472			fD	40.5	33.6						1.2724	-17.9323											0.377358	-6.65472			fD	23.5	35						3.38532
																	eta_N2O/N2	-15.9	-6																						eta_N2O/N2	-15.9	-6
													a _mix	b_mix	X_intercept (d18O)	Y_intercept (SP)	r N2O	f bD	r total	f bD gross					b_red	X_intercept (d18O)	Y_intercept (SP)	r N2O	f bD								a _mix	b_mix	X_intercept (d18O)	Y_intercept (SP)	r N2O	f bD	r total	f bD gross					b_red
1	L1-N1/1	2018-02-22	12:00:00	2018-02-22 12:00:00			43.5	-3.17675	8.74998				-8.28347	369.081	43.3833	9.71634	0.144272	1	0.144272	1	0.150521	0.0332576	0.988357	0.0152859	-7.6651	11.4711	-3.33637	0.133402	1	0.147337	0.0646111	0.933305	0.0805485				-1.3125	65.8439	42.902	9.53473	0.148705	1	0.148705	1	0.144884	0.0171283	0.992437	0.00974052	-7.6651
	L1-N2/1	2018-02-22					40.597	-12.2336	12.7178				-215.264	8751.79	40.6158	8.672	0.171701	0.837702	0.198368	0.967805					-2.60185	17.1281	3.8616	0.228543	0.837702								-1.30328	65.6271	43.0085	9.57491	0.147713	0.876387	0.165108	0.979591					-2.60185
	L1-N3/1	2018-02-22					47.4625	-2.38775	5.02216				-4.10456	199.835	46.0716	10.7308	0.121829	1	0.121829	1					-12.8882	5.63555	-10.7616	0.0720336	1								-1.25103	64.3993	43.6345	9.81112	0.142011	1	0.142011	1					-12.8882
	L1-Ne2/1	2018-02-22					45.1199	-9.55211	12.9807				-4.46318	214.359	45.6589	10.575	0.125033	0.89552	0.137614	0.985622					-4.04567	15.515	1.80905	0.155371	0.89552								-1.01848	58.9342	46.989	11.077	0.114999	0.920424	0.123711	0.990156					-4.04567
2	L1-N1/2	2018-02-23	15:00:00	2018-02-23 15:00:00			42.0009	-0.106262	8.27682				-16.8719	716.914	41.9477	9.1746	0.157904	1	0.157904	1	0.162988	0.0141843	0.984633	0.0179763	-7.57257	11.5745	-3.20483	0.147547	1	0.163607	0.0392108	0.902802	0.112428				-1.44443	68.944	41.4971	9.00456	0.162443	1	0.162443	1	0.157008	0.0404358	0.990569	0.0110018	-7.57257
	L1-N2/2	2018-02-23					43.2031	-6.92143	14.704				-6.99038	316.71	43.8893	9.9073	0.139752	0.797544	0.169225	0.965739					-1.59905	18.2485	5.28718	0.208155	0.797544								-1.03009	59.2071	46.7952	11.0039	0.116409	0.845802	0.134772	0.979218					-1.59905
	L1-N3/2	2018-02-23					39.8424	-1.76823	2.35314				47.5145	-1890.74	39.9702	8.42839	0.178816	1	0.178816	1					-12.6817	5.86625	-10.468	0.118025	1								-1.99768	81.9455	37.3047	7.42254	0.211452	1	0.211452	1					-12.6817
	L1-Ne2/2	2018-02-23					45.0022	-6.67594	14.9804				-4.13568	201.095	46.0332	10.7163	0.122124	0.813662	0.146008	0.972793					-2.00153	17.7988	4.71501	0.180703	0.813662								-0.931049	56.8796	48.5586	11.6693	0.104189	0.858078	0.119365	0.983059					-2.00153
3	L1-N1/3	2018-02-24	16:00:00	2018-02-24 16:00:00			40.801	-1.32165	2.43502				-103.532	4226.64	40.7403	8.71899	0.170362	1	0.170362	1	0.209946	0.0768646	0.994202	0.011597	-12.9616	5.55356	-10.8659	0.108955	1	0.185734	0.0722342	0.966657	0.0666858				-1.88226	79.2331	38.0099	7.68864	0.202279	1	0.202279	1	0.223882	0.0971343	0.996179	0.00764195	-12.9616
	L1-N2/3	2018-02-24					40.7575	-2.62855	7.54812				-101.178	4131.32	40.7459	8.72109	0.170302	1	0.170302	1					-7.83206	11.2846	-3.57372	0.156666	1								-1.59072	72.382	40.1593	8.49972	0.176703	1	0.176703	1					-7.83206
	L1-N3/3	2018-02-24					29.1011	-5.97224	0.947132				2.86457	-82.4152	30.46	4.83961	0.325215	1	0.325215	1					-10.0344	8.82397	-6.70463	0.279349	1								-6.07964	177.871	28.5777	4.12933	0.366086	1	0.366086	1					-10.0344
	L1-Ne2/3	2018-02-24					42.0737	-2.33144	12.5527				-13.3742	575.255	42.3159	9.31355	0.154289	0.866628	0.173905	0.976806					-3.3242	16.3211	2.83469	0.197965	0.866628								-1.20855	63.401	44.1738	10.0146	0.137274	0.898419	0.15046	0.984716					-3.3242
4	L1-N1/4	2018-02-26	10:30:00	2018-02-26 10:30:00			43.3397	-6.52165	8.89303				-8.70067	385.977	43.2508	9.66633	0.145479	1	0.145479	1	0.145479		1		-7.46156	11.6985	-3.04702	0.136694	1	0.136694		1					-1.3159	65.9236	42.8632	9.52006	0.149069	1	0.149069	1	0.149069		1		-7.46156
5	L1-N1/5	2018-02-27	10:30:00	2018-02-27 10:30:00			34.5878	-14.0572	3.68892				5.05923	-171.299	35.1663	6.61559	0.241892	1	0.241892	1	0.241892		1		-9.36309	9.57403	-5.75024	0.207382	1	0.207382		1					-2.82392	101.362	33.7418	6.07803	0.264564	1	0.264564	1	0.264564		1		-9.36309
6	L1-N2/6	2018-02-28	13:30:00	2018-02-28 13:30:00			35.2621	-11.6485	1.44231				6.13943	-215.047	36.1662	6.9929	0.227149	1	0.227149	1	0.197468	0.0835031	0.995017	0.00863072	-11.8641	6.77969	-9.30577	0.166735	1	0.1825	0.0647881	0.951706	0.0836476				-2.85303	102.046	33.6495	6.0432	0.266104	1	0.266104	1	0.207832	0.102428	0.996706	0.00570596	-11.8641
	L1-N4/6	2018-02-28					33.732	-8.29161	5.46974				4.15635	-134.732	33.892	6.13471	0.262077	1	0.262077	1					-7.25931	11.9245	-2.7595	0.253716	1								-2.88607	102.823	33.5467	6.00442	0.26783	1	0.26783	1					-7.25931
	L1-Ne3/6	2018-02-28					49.4467	-1.11912	15.6224				-2.00941	114.981	50.9625	12.5764	0.0895696	0.855118	0.10318	0.985051					-3.03677	16.6422	3.24331	0.12705	0.855118								-0.746824	52.5504	52.665	13.2189	0.0804748	0.889652	0.0895624	0.990117					-3.03677
7	L1-N1/7	2018-03-01	10:30:00	2018-03-01 10:30:00			31.586	-4.26125	2.4231				3.49752	-108.05	32.4967	5.60817	0.286115	1	0.286115	1	0.216059	0.111515	0.96382	0.0486187	-9.49614	9.42537	-5.9394	0.248143	1	0.240399	0.112642	0.790101	0.256813				-4.0288	129.677	30.9411	5.02118	0.315521	1	0.315521	1	0.194009	0.112427	0.982848	0.024183	-9.49614
	L1-N2/7	2018-03-01					40.5464	-1.8942	2.58545				-668.069	27090.4	40.5374	8.6424	0.17255	1	0.17255	1					-12.7151	5.82896	-10.5155	0.112648	1								-1.90155	79.6863	37.8871	7.6423	0.203848	1	0.203848	1					-12.7151
	L1-N4/7	2018-03-01					36.567	6.38442	15.0304				4.7215	-157.621	34.7516	6.45911	0.248283	0.684194	0.325573	0.897182					1.23149	21.411	9.3111	0.385502	0.684194								-1.52825	70.9139	40.7054	8.70582	0.170736	0.75947	0.213277	0.948701					1.23149
	L1-Ne3/7	2018-03-01					51.6314	-1.97891	25.9087				-0.69095	61.5835	63.875	17.4491	0.0397621	0.476212	0.0799979	0.958098					6.42517	27.2137	16.6945	0.215303	0.476212								-0.323171	42.5945	70.3029	19.8747	0.0265398	0.601062	0.0433904	0.98269					6.42517
8	L1-N1/8	2018-03-02	11:30:00	2018-03-02 11:30:00			38.2572	3.50785	9.58342				10.7082	-400.081	38.0828	7.71615	0.201354	0.92786	0.213664	0.984586	0.183224	0.0430608	0.986824	0.0122125	-4.85325	14.6127	0.660987	0.226033	0.92786	0.191557	0.0307944	0.915944	0.0906027				-1.72232	75.4745	39.1151	8.10571	0.188696	0.945055	0.1975	0.989148	0.173787	0.0551665	0.991322	0.00782118	-4.85325
	L1-N2/8	2018-03-02					46.1009	14.5926	15.2374				-3.27849	166.379	47.3306	11.2059	0.112555	0.819974	0.133956	0.975884					-2.15915	17.6227	4.49094	0.16678	0.819974								-0.874415	55.5487	49.6923	12.0971	0.0970191	0.862885	0.110729	0.984817					-2.15915
	L1-N3/8	2018-03-02					37.8649	21.7919	5.98969				10.4779	-390.755	38.0277	7.69535	0.202053	1	0.202053	1					-8.29895	10.763	-4.23746	0.181859	1								-2.01953	82.4589	37.1789	7.37506	0.213132	1	0.213132	1					-8.29895
							40.766	-2.44048	8.96427							min	0.0397621	0.476212	0.0799979	0.897182	0.145479		0.96382				min	0.0720336	0.476212	0.136694		0.790101								min	0.0265398	0.601062	0.0433904	0.948701	0.144884		0.982848
							5.51065	7.99868	6.17795							max	0.325215	1	0.325573	1	0.241892		1				max	0.385502	1	0.240399		1								max	0.366086	1	0.366086	1	0.264564		1
																av	0.175435	0.915601	0.186979	0.986232	0.188447	0.0340639	0.989107	0.0117316			av	0.18394	0.915601	0.181901		0.932564								av	0.178075	0.935718	0.184901	0.992176	0.189379		0.993758
[truncated: 8 more columns]

## Sheet: L2
		date	time	date full		isotopes	d18O	d15N	SP		mixing scenario		Case 1					X	Y		r_av	r_stdev	f_av	f_stdev	Case2					r_av	r_stdev	f_av	f_stdev		mixing scenario		Case 1					X	Y		r_av	r_stdev	f_av	f_stdev	Case2
											bD-fD		a_red	b_red			bD	12.6	-1.9						a_mix	b_mix									bD-Ni		a_red	b_red			bD	12.6	-1.9						a_mix
							X		Y				0.377358	-6.65472			fD	40.5	33.6						1.2724	-17.9323											0.377358	-6.65472			fD	23.5	35						3.38532
																	eta_N2O/N2	-15.9	-6																						eta_N2O/N2	-15.9	-6
													a _mix	b_mix	X_intercept (d18O)	Y_intercept (SP)	r N2O	f bD	r total	f bD gross					b_red	X_intercept (d18O)	Y_intercept (SP)	r N2O	f bD								a _mix	b_mix	X_intercept (d18O)	Y_intercept (SP)	r N2O	f bD	r total	f bD gross					b_red
1	L2-N5/1	2018-02-22	12:00:00	2018-02-22 12:00:00			35.7738	-15.3155	7.37821				5.54813	-191.099	35.6706	6.80589	0.23434	0.97864	0.238236	0.994911	0.244276	0.0319859	0.992988	0.0116635	-6.12132	13.1959	-1.14171	0.241717	0.97864	0.244216	0.0254757	0.967661	0.0575854				-2.25047	87.8862	35.9767	6.92141	0.229871	0.983731	0.232788	0.996213	0.240977	0.0435806	0.995294	0.00742262	-6.12132
	L2-N6/1	2018-02-22					33.1723	-18.9719	6.07771				3.75593	-118.515	33.1088	5.83917	0.275309	0.991407	0.277034	0.997619					-6.44014	12.8397	-1.59495	0.278377	0.991407								-2.99022	105.27	33.236	5.88718	0.273115	0.993455	0.27442	0.998204					-6.44014
	L2-N7/1	2018-02-22					38.0963	-10.8744	7.39737				10.9008	-407.881	38.127	7.73284	0.200794	1	0.200794	1					-6.97857	12.2382	-2.3604	0.196657	1								-1.89108	79.4403	37.9535	7.66735	0.202998	1	0.202998	1					-6.97857
	L2-N8/1	2018-02-22					33.1633	-13.7584	4.36366				3.98497	-127.791	33.578	6.01624	0.267303	1	0.267303	1					-8.15081	10.9285	-4.02685	0.246987	1								-3.17037	109.504	32.7416	5.70062	0.28174	1	0.28174	1					-8.15081
	L2-Ne5/1	2018-02-22					40.239	-9.69228	12.5009				80.8529	-3240.94	40.1897	8.51121	0.176365	0.840976	0.202946	0.967727					-2.68363	17.0368	3.74534	0.232407	0.840976								-1.34411	66.5865	42.5459	9.40032	0.152074	0.878881	0.16948	0.979473					-2.68363
	L2-Ne6/1	2018-02-22					32.8515	-16.8054	4.55337				3.79768	-120.206	33.199	5.87322	0.273751	1	0.273751	1					-7.84341	11.2719	-3.58986	0.257379	1								-3.25581	111.511	32.5243	5.61861	0.285618	1	0.285618	1					-7.84341
	L2-Ne7/1	2018-02-22					35.3092	-18.0257	7.60338				5.00817	-169.231	35.1075	6.59339	0.242788	0.962602	0.249864	0.990656					-5.72084	13.6434	-0.572385	0.255987	0.962602								-2.31995	89.5187	35.6554	6.80015	0.234565	0.971517	0.239793	0.99317					-5.72084
2	L2-N5/2	2018-02-23	15:00:00	2018-02-23 15:00:00			38.974	-5.91911	7.36606				17.1916	-662.661	39.0149	8.06787	0.18989	1	0.18989	1	0.187468	0.0308029	0.999465	0.0013115	-7.34112	11.8331	-2.87579	0.181414	1	0.173922	0.0370919	0.996906	0.00757963				-1.78583	76.9669	38.6567	7.93272	0.194215	1	0.194215	1	0.193897	0.0298077	0.9996	0.000980133	-7.34112
	L2-N6/2	2018-02-23					39.4091	-9.7768	6.06275				25.242	-988.703	39.4957	8.24932	0.184233	1	0.184233	1					-8.8086	10.1935	-4.96198	0.159222	1								-1.81892	77.7445	38.4284	7.84656	0.197025	1	0.197025	1					-8.8086
	L2-N7/2	2018-02-23					41.5583	-7.75546	6.43953				-25.6647	1073.02	41.4589	8.99015	0.162834	1	0.162834	1					-9.24284	9.70838	-5.57931	0.134911	1								-1.58157	72.1669	40.2371	8.52909	0.17584	1	0.17584	1					-9.24284
	L2-N8/2	2018-02-23					34.7484	-7.99302	6.04835				4.79026	-160.405	34.8412	6.49291	0.246889	1	0.246889	1					-7.06425	12.1424	-2.4822	0.241289	1								-2.57385	95.4854	34.6096	6.40552	0.250511	1	0.250511	1					-7.06425
	L2-Ne6/2	2018-02-23					40.9972	-8.29888	7.29489				-52.9079	2176.37	40.9686	8.80515	0.167933	1	0.167933	1					-8.17575	10.9006	-4.06231	0.150639	1								-1.5834	72.21	40.2215	8.52319	0.176013	1	0.176013	1					-8.17575
	L2-Ne7/2	2018-02-23					40.7357	-12.1161	9.18086				-103.623	4230.33	40.7401	8.71891	0.170364	0.981434	0.173029	0.996788					-6.19109	13.118	-1.2409	0.176055	0.981434								-1.49801	70.2032	40.9829	8.81052	0.167783	0.985859	0.169781	0.997599					-6.19109
3	L2-N5/3	2018-02-24	16:00:00	2018-02-24 16:00:00			40.6426	-7.48912	6.436				-190.543	7750.6	40.6308	8.67766	0.171539	1	0.171539	1	0.168183	0.0277274	0.999477	0.00128063	-8.90081	10.0905	-5.09307	0.146385	1	0.149162	0.03768	0.997023	0.00729272				-1.66626	74.1572	39.5435	8.26735	0.18368	1	0.18368	1	0.176625	0.0257902	0.999609	0.000957712	-8.90081
	L2-N6/3	2018-02-24					41.7324	-4.13815	5.73104				-22.6131	949.43	41.5862	9.03818	0.161536	1	0.161536	1					-10.017	8.84339	-6.67992	0.126376	1								-1.60532	72.7251	40.0366	8.45343	0.178071	1	0.178071	1					-10.017
	L2-N7/3	2018-02-24					43.9336	-4.86903	6.33673				-7.94007	355.173	43.5023	9.76126	0.143196	1	0.143196	1					-10.242	8.59206	-6.99971	0.108312	1								-1.40275	67.9646	41.9184	9.16356	0.158195	1	0.158195	1					-10.242
	L2-N8/3	2018-02-24					36.8318	-4.13753	6.63065				7.35212	-264.161	36.9197	7.27725	0.216635	1	0.216635	1					-7.26813	11.9147	-2.77203	0.208647	1								-2.12795	85.0069	36.5869	7.15167	0.221217	1	0.221217	1					-7.26813
	L2-Ne6/3	2018-02-24					43.9689	-5.98001	8.61683				-7.20205	325.283	43.7947	9.87158	0.140587	1	0.140587	1					-7.97521	11.1247	-3.77723	0.126733	1								-1.28894	65.2901	43.1764	9.63827	0.146161	1	0.146161	1					-7.97521
	L2-Ne7/3	2018-02-24					40.4951	-11.0776	9.07254				5011.47	-202931	40.495	8.62642	0.17301	0.982137	0.175605	0.996863					-6.20864	13.0984	-1.26585	0.178518	0.982137								-1.52558	70.8512	40.7295	8.71491	0.170477	0.986395	0.172423	0.997654					-6.20864
4	L2-N5/4	2018-02-26	10:30:00	2018-02-26 10:30:00			44.0261	-4.87778	11.3206				-6.31849	289.499	44.2294	10.0356	0.136795	0.94547	0.143552	0.992172	0.169768	0.0321293	0.997806	0.00378261	-5.29301	14.1214	0.0358129	0.152468	0.94547	0.164334	0.0339922	0.984801	0.0263866				-1.15363	62.1102	44.9155	10.2945	0.131018	0.958468	0.135923	0.994355	0.171466	0.0357206	0.99841	0.00272421	-5.29301
	L2-N6/4	2018-02-26					37.0211	-8.31418	7.25713				7.57221	-273.074	37.0292	7.31858	0.215148	1	0.215148	1					-6.7131	12.5348	-1.98299	0.214377	1								-2.05182	83.2177	36.9971	7.30644	0.215583	1	0.215583	1					-6.7131
	L2-N7/4	2018-02-26
	L2-Ne6/4	2018-02-26					42.7233	-7.8651	9.62372				-10.7842	470.361	42.7373	9.47256	0.150254	0.993735	0.151058	0.999054					-6.49827	12.7748	-1.67759	0.152049	0.993735								-1.32008	66.0219	42.8154	9.50205	0.149517	0.995228	0.150127	0.999284					-6.49827
	L2-Ne7/4	2018-02-26					40.8769	-9.67222	5.94013				-73.387	3005.77	40.8385	8.75605	0.169313	1	0.169313	1					-9.48512	9.4377	-5.92372	0.138441	1								-1.67233	74.2997	39.496	8.24944	0.18423	1	0.18423	1					-9.48512
5	L2-N5/5	2018-02-27	10:30:00	2018-02-27 10:30:00			47.6931	-3.7324	11.2656				-3.105	159.352	47.6709	11.3343	0.110171	1	0.110171	1	0.158681	0.0447772	0.997346	0.00459688	-6.73183	12.5138	-2.00962	0.109424	1	0.154703	0.0480671	0.986625	0.0231661				-0.981044	58.0545	47.6363	11.3212	0.110412	1	0.110412	1	0.158794	0.042513	0.998063	0.00335553	-6.73183
	L2-N7/5	2018-02-27					38.9059	-8.62821	9.02876				15.4143	-590.681	38.8393	8.00163	0.191998	0.959875	0.198431	0.992038					-5.65273	13.7195	-0.475567	0.205142	0.959875								-1.68579	74.6161	39.3916	8.21004	0.185443	0.969439	0.190177	0.994188					-5.65273
	L2-Ne7/5	2018-02-27					41.0479	-8.96687	7.25561				-48.0847	1981.03	41.0153	8.82275	0.167441	1	0.167441	1					-8.23415	10.8354	-4.14534	0.149545	1								-1.58107	72.1551	40.2414	8.53071	0.175792	1	0.175792	1					-8.23415
6	L2-N5/6	2018-02-28	13:30:00	2018-02-28 13:30:00			30.2863	-26.8756	5.84707				2.71722	-76.4473	29.8277	4.60101	0.338408	0.957031	0.34831	0.985034	0.436899	0.126004	0.964392	0.0271449	-5.58171	13.7988	-0.374605	0.354536	0.957031	0.444616	0.128204	0.927025	0.0405887				-4.29587	135.953	30.5159	4.86071	0.324074	0.967273	0.331405	0.989154	0.395738	0.0951414	0.975905	0.0174521	-5.58171
	L2-N6/6	2018-02-28					25.0275	-38.2865	5.81839				1.79554	-39.1194	22.8918	1.98369	0.523467	0.878711	0.555579	0.932614					-3.62593	15.984	2.40576	0.56622	0.878711								-19.1048	483.962	25.1829	2.84827	0.45322	0.907622	0.47733	0.955905					-3.62593
	L2-N7/6	2018-02-28					31.9721	-20.0386	6.31097				3.19996	-95.9984	31.653	5.28979	0.301707	0.963929	0.309503	0.988836					-5.75396	13.6064	-0.619482	0.315034	0.963929								-3.38631	114.578	32.2114	5.50053	0.291294	0.972527	0.297078	0.991838					-5.75396
	L2-N8/6	2018-02-28					24.8736	-27.2788	5.01823				1.82907	-40.4773	23.2984	2.13715	0.510248	0.908429	0.534206	0.951082					-4.36803	15.1548	1.35077	0.542675	0.908429								-21.827	547.935	24.9766	2.77041	0.459139	0.930256	0.477138	0.966722					-4.36803
7	L2-N5/7	2018-03-01	10:30:00	2018-03-01 10:30:00			26.0133	-38.1125	6.15274				1.89465	-43.1334	24.0419	2.41772	0.486938	0.88022	0.518822	0.937855	0.518822		0.937855		-3.6636	15.9419	2.3522	0.530772	0.88022	0.530772		0.88022					-11.4779	304.73	26.2656	3.25683	0.423386	0.908771	0.446894	0.95923	0.446894		0.95923		-3.6636
8	L2-N6/8	2018-03-02	11:30:00	2018-03-02 11:30:00			30.6737	-35.5935	8.93828				2.50976	-68.0454	28.7894	4.20922	0.361244	0.839097	0.402624	0.935217	0.402624		0.935217		-2.6367	17.0892	3.81206	0.425551	0.839097	0.425551		0.839097					-3.63296	120.375	31.6756	5.29834	0.301277	0.87745	0.329491	0.959621	0.329491		0.959621		-2.6367
9	L2-N5/9	2018-03-03	14:00:00	2018-03-03 14:00:00			33.6504	-34.5053	11.7625				3.18813	-95.5192	31.6157	5.27574	0.302415	0.770981	0.359915	0.917573	0.358392	0.0210782	0.919192	0.00548724	-0.935723	18.9896	6.23017	0.397699	0.770981	0.395533	0.0200052	0.7746	0.0035567				-2.28932	88.799	35.795	6.85283	0.232514	0.82557	0.268452	0.953174	0.268732	0.0147012	0.953854	0.00290776	-0.935723
	L2-N6/9	2018-03-03					34.4063	-32.5505	11.8702				3.56593	-110.82	32.6684	5.67297	0.283041	0.778091	0.336593	0.925307					-1.11327	18.7913	5.97777	0.374533	0.778091								-2.12077	84.8382	36.6245	7.16586	0.220694	0.830985	0.254173	0.957041					-1.11327
	L2-N8/9	2018-03-03					32.8931	-34.6085	11.3832				2.9206	-84.6841	30.6811	4.92307	0.320723	0.774728	0.378667	0.914697					-1.02929	18.8851	6.09715	0.414367	0.774728								-2.51429	94.0857	34.8385	6.49187	0.246931	0.828424	0.283571	0.951346					-1.02929
10	L2-N5/10	2018-03-04	16:00:00	2018-03-04 16:00:00			35.2424	-33.2571	14.2602				3.67843	-115.376	32.9353	5.77369	0.27833	0.695019	0.356877	0.891159	0.337377	0.0340109	0.909963	0.0179175	0.961182	21.109	8.92683	0.411111	0.695019	0.384456	0.0359662	0.734298	0.0340229				-1.76624	76.5066	38.7952	7.98499	0.192531	0.767714	0.23698	0.944953	0.238368	0.0205783	0.951776	0.00711654	0.961182
	L2-N6/10	2018-03-04					36.4353	-30.2871	13.2231				5.01315	-169.433	35.1133	6.59558	0.2427	0.754578	0.298105	0.926838					-0.526102	19.4473	6.8125	0.343548	0.754578								-1.68353	74.5629	39.4091	8.21664	0.185239	0.813077	0.218519	0.959154					-0.526102
	L2-N8/10	2018-03-04					34.1034	-33.9359	12.3751				3.31815	-100.785	32.0085	5.42397	0.295035	0.753298	0.357149	0.91189					-0.494143	19.483	6.85793	0.39871	0.753298								-2.13375	85.1431	36.5567	7.14027	0.221638	0.812102	0.259606	0.951221					-0.494143
11	L2-N5/11	2018-03-05	07:00:00	2018-03-05 07:00:00			35.9642	-33.015	15.3491				4.02372	-129.361	33.6516	6.04401	0.266069	0.662319	0.353737	0.88055	0.341911	0.0370047	0.890998	0.0178498	1.77775	22.0213	10.0877	0.416066	0.662319	0.400382	0.0378159	0.682464	0.0219095				-1.57659	72.0498	40.2798	8.54521	0.175368	0.742809	0.222573	0.942756	0.222377	0.0177745	0.946097	0.00702928	1.77775
	L2-N6/11	2018-03-05					37.1748	-29.6683	14.7204				5.67766	-196.345	35.7886	6.85042	0.232607	0.70579	0.300439	0.911608					0.692202	20.8085	8.54445	0.357247	0.70579								-1.48299	69.8504	41.124	8.86376	0.1663	0.775918	0.204505	0.954174					0.692202
	L2-N8/11	2018-03-05					35.0476	-33.411	14.5797				3.4884	-107.68	32.4732	5.59932	0.286537	0.679281	0.371557	0.880835					1.35417	21.548	9.48551	0.427832	0.679281								-1.76837	76.5567	38.78	7.97926	0.192715	0.755728	0.240053	0.941362					1.35417
							37.5193	-12.7627	7.28806							min	0.110171	0.840976	0.110171	0.932614	0.158681		0.937855				min	0.108312	0.840976	0.149162		0.88022								min	0.110412	0.878881	0.110412	0.955905	0.158794		0.95923
							5.70751	9.1291	1.96292							max	0.523467	1	0.555579	1	0.518822		0.999477				max	0.56622	1	0.530772		0.997023								max	0.459139	1	0.47733	1	0.446894		0.999609
																av	0.22907	0.974987	0.234367	0.991073	0.269157	0.123992	0.98419	0.0413051			av	0.228345	0.974987	0.265961		0.962894								av	0.225235	0.980949	0.229099	0.993967	0.254913		0.989444
[truncated: 8 more columns]
